# Supplementary material for: Fabrication of PMPC/PTM/PEGDA micropatterns onto polypropylene films behaving with dual functions of antifouling and antimicrobial activities
Source: Royal Society of Chemistry journal article supplement (doi:10.1039/c9tb00927b), 2019-01-01
Supplement: c9tb00927b1.pdf [file c9tb00927b1.pdf]

## *Supporting Information*

# **Fabrication of PMPC/PTM/PEGDA Micropatterns onto Polypropylene Films Behaving Dual Functions of Antifouling and Antimicrobial Activities**

Liu Jiang,<sup>†</sup> Wancheng Zhu,<sup>†</sup> Huaming Qian,<sup>†</sup> Changhao Wang<sup>\*,†</sup>, Yashao Chen<sup>\*,†</sup> and Peng Liu<sup>\*,‡</sup>

<sup>†</sup>Key Laboratory of Applied Surface and Colloid Chemistry, Ministry of Education, School of Chemistry & Chemical Engineering, Shaanxi Normal University, Xi'an 710119, China

<sup>‡</sup>Key Laboratory of Biorheological Science and Technology, Ministry of Education, College of Bioengineering, Chongqing University, Chongqing, 400044, China

### **Corresponding authors:**

Yashao Chen (Email: yschen@snnu.edu.cn)

Changhao Wang (Email: changhaowang@snnu.edu.cn)

Peng Liu (Email: liupeng79@cqu.edu.cn)

**Table S1.** Contact angels of PP-PMPC/PTM/PEGDA with different amount of PEGDA

| Samples                                      | Contact angels with different amount of PEGDA (wt.%) |       |       |       |       |       |
|----------------------------------------------|------------------------------------------------------|-------|-------|-------|-------|-------|
|                                              | 0.5                                                  | 1.0   | 2.5   | 5.0   | 7.5   | 10.0  |
| PP-PMPC/PTM/PEGDA coating                    | 14.7°                                                | 22.3° | 30.9° | 35.9° | 42.6° | 46.9° |
| 5 $\mu\text{m}$ patterned PP-PMPC/PTM/PEGDA  | 77.0°                                                | 52.4° | 28.8° | 29.0° | 40.1° | 46.1° |
| 10 $\mu\text{m}$ patterned PP-PMPC/PTM/PEGDA | 48.9°                                                | 36.6° | 28.0° | 31.3° | 34.1° | 47.3° |

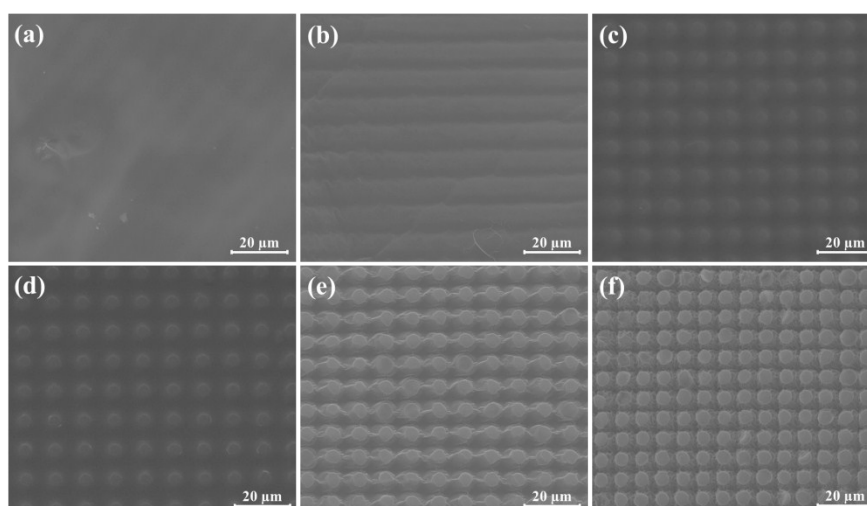

**Figure S1.** SEM images of 5  $\mu\text{m}$  PP-PMPC/PTM/PEGDA surface with different PEGDA addition of (a) 0.5%, (b) 1.0%, (c) 2.5%, (d) 5.0%, (e) 7.5% and (f) 10.0%.

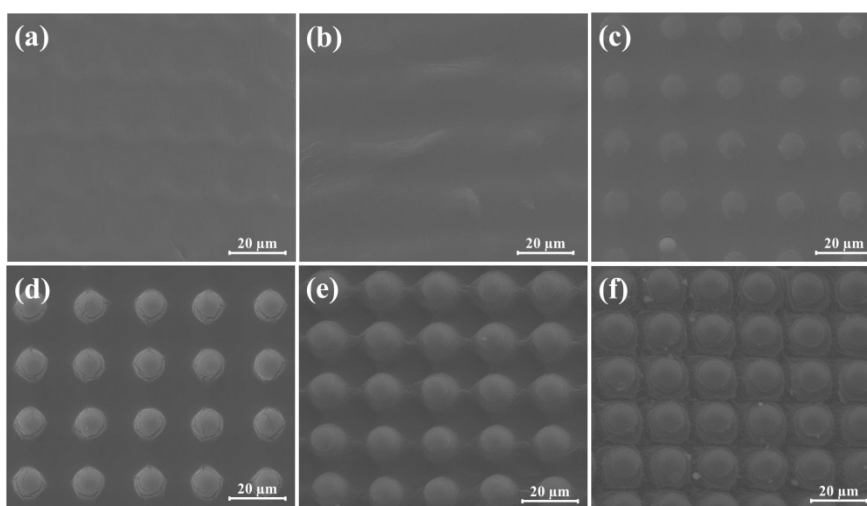

**Figure S2.** SEM images of 10  $\mu\text{m}$  PP-PMPC/PTM/PEGDA surface with different PEGDA addition of (a) 0.5%, (b) 1.0%, (c) 2.5%, (d) 5.0%, (e) 7.5% and (f) 10.0%.

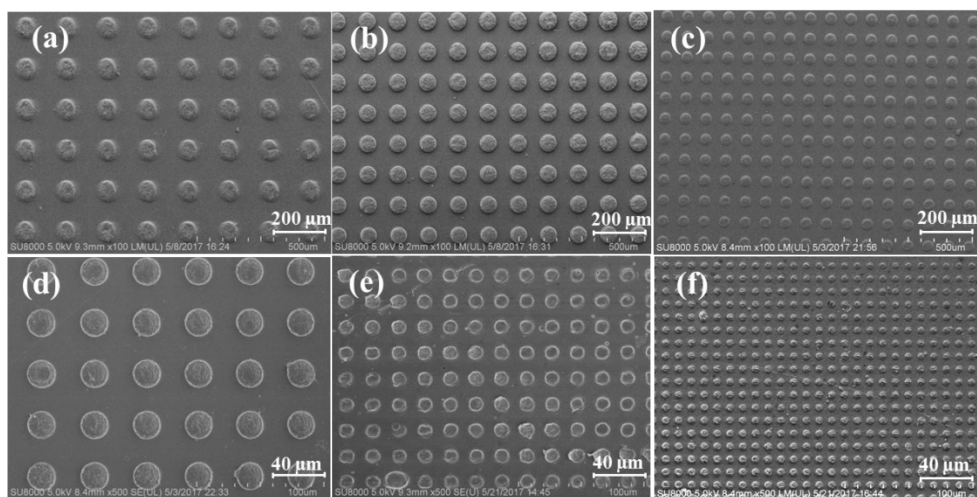

**Figure S3.** SEM images of patterned PP-PMPC/PTM/PEGDA samples with different micropattern sizes of (a) 80  $\mu\text{m}$ , (b) 60  $\mu\text{m}$ , (c) 40  $\mu\text{m}$ , (d) 20  $\mu\text{m}$ , (e) 10  $\mu\text{m}$  and (f) 5  $\mu\text{m}$ .

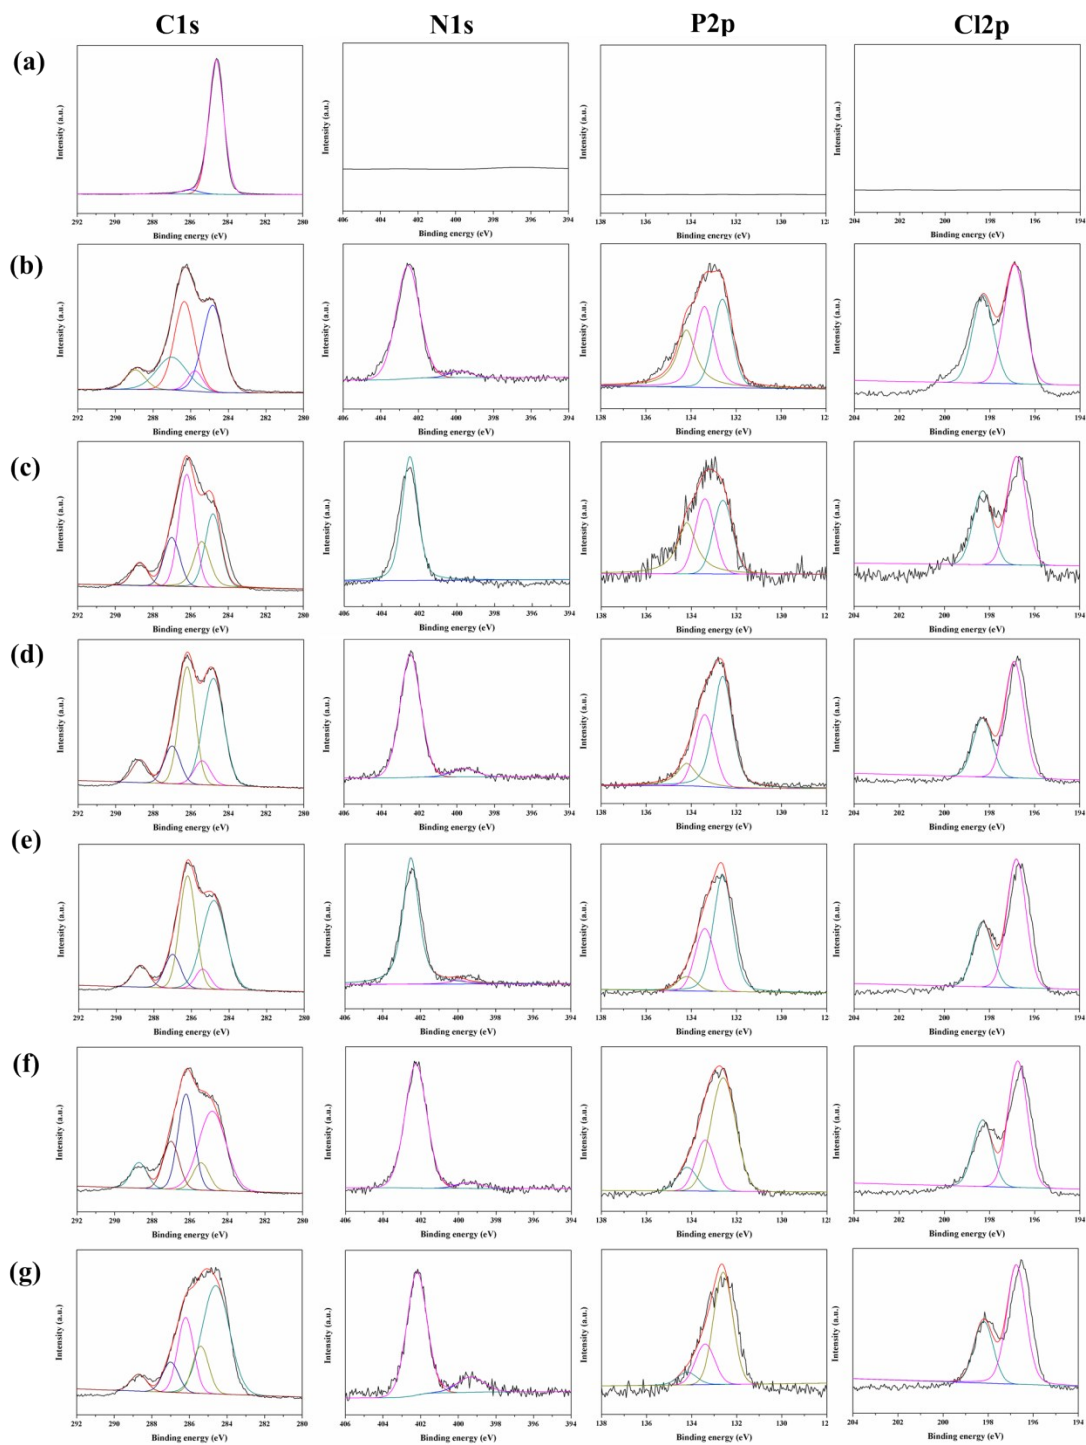

**Figure S4.** XPS core-level spectra of characteristic elements for (a) pristine PP, and patterned PP-PMPC/PTM/PEGDA with different micropattern size of (b) 80  $\mu\text{m}$ , (c) 60  $\mu\text{m}$ , (d) 40  $\mu\text{m}$ , (e) 20  $\mu\text{m}$ , (f) 10  $\mu\text{m}$ , (g) 5  $\mu\text{m}$ .

The C1s spectra of pristine PP (Figure S5a) contained a large amount of C-C/C-H (284.6 eV) and trace amounts of C-O (286.2 eV). Patterned PP-PMPC/PTM/PEGDA samples of different micropattern size (Figure S5b-g) showed significant characteristic peaks at 284.6 eV, 286.2 eV, 285.4 eV, 287.0 eV, 288.7 eV for the C1s spectra. 284.6 eV corresponded to C-C/C-H, 286.2 eV corresponded to C-O, and 285.4 eV, 287.0 eV, 288.7 eV corresponded to C-N, C=O, and O-C=O in MPC molecules and TM molecules, respectively. For the N1s spectra, a clear peak appeared at 402.5 eV, corresponding to C-N<sup>+</sup> in the MPC and TM molecules. The P2p spectra had distinct characteristic peaks at 132.6 eV, 133.4 eV, and 134.2 eV, corresponding to P=O, P-O, and O-P-O in the MPC molecule, respectively. For the Cl2p spectra, characteristic peaks appeared at 198.3 eV and 196.7 eV, correspond to Cl split peaks Cl2p<sub>1/2</sub> and Cl2p<sub>3/2</sub>, and the peak area ratio of the two peaks is 1:2. The above results fully indicated that the different sizes of PMPC/PTM/PEGDA micro-patterned molecular layers were successfully grafted on the PP surface.
